# Supplementary material for: Retinal Alterations as Potential Biomarkers of Structural Brain Changes in Alzheimer’s Disease Spectrum Patients
Source: MDPI journal article supplement (doi:10.3390/brainsci13030460), 2023-03-08
Supplement: s1 [file s1]

**Table S1.** Comparison of retinal measures between cognitively normal group and cognitive impairment group.

| Items             | CN (21)        | CI (27)        | t     | p-value |
|-------------------|----------------|----------------|-------|---------|
| Vessel Density    |                |                |       |         |
| Center Ring       | 5.44 ± 2.63    | 3.8 ± 3.08     | 0.495 | 0.486   |
| Inner Ring        | 13.87 ± 3.07   | 13.11 ± 3.69   | 0.705 | 0.407   |
| Outer Ring        | 15.4 ± 2.47    | 14.42 ± 3.13   | 2.865 | 0.099   |
| Full Ring         | 14.75 ± 2.51   | 13.65 ± 3.47   | 2.146 | 0.152   |
| TI                | 13.52 ± 3.63   | 13.61 ± 3.01   | 0.635 | 0.431   |
| SI                | 16.45 ± 12.82  | 12.74 ± 4.08   | 1.172 | 0.286   |
| NI                | 14.16 ± 2.88   | 12.86 ± 3.34   | 0.449 | 0.507   |
| II                | 13.91 ± 3.36   | 13.91 ± 2.94   | 0.091 | 0.765   |
| TO                | 13.59 ± 3.3    | 13.81 ± 2.93   | 0.485 | 0.491   |
| SO                | 15.03 ± 2.8    | 14.08 ± 3.58   | 3.005 | 0.092   |
| NO                | 17.43 ± 2.75   | 16.39 ± 2.55   | 1.108 | 0.299   |
| IO                | 15.48 ± 2.72   | 14.69 ± 2.76   | 4.144 | 0.049*  |
| FAZ Area          | 0.23 ± 0.09    | 0.28 ± 0.16    | 0.026 | 0.874   |
| RNFL Thickness    |                |                |       |         |
| Full              | 95 ± 8.23      | 92.5 ± 10.25   | 0.026 | 0.874   |
| T                 | 70.29 ± 13.72  | 70.13 ± 13.01  | 0.297 | 0.589   |
| S                 | 117.37 ± 15.22 | 103.3 ± 30.68  | 0.052 | 0.821   |
| N                 | 82.97 ± 43.85  | 65.93 ± 12.08  | 0.289 | 0.594   |
| I                 | 122.29 ± 14.49 | 118.2 ± 18.29  | 0.085 | 0.772   |
| ILM-RPE Thickness |                |                |       |         |
| TI                | 320.15 ± 14.46 | 317.5 ± 14.7   | 0.017 | 0.898   |
| SI                | 280.15 ± 12.47 | 276.84 ± 9.54  | 0.030 | 0.864   |
| NI                | 314.45 ± 14.58 | 311.94 ± 15.52 | 0.038 | 0.846   |
| II                | 266.2 ± 12.35  | 266.35 ± 12.81 | 0.101 | 0.752   |
| TO                | 307.2 ± 14.95  | 305.68 ± 14.44 | 0.187 | 0.668   |
| SO                | 263.65 ± 14.41 | 264.26 ± 9.8   | 0.273 | 0.605   |
| NO                | 320.4 ± 16.12  | 318.76 ± 16.06 | 0.017 | 0.897   |
| IO                | 294.4 ± 12.87  | 294.94 ± 11.84 | 0.006 | 0.939   |

Data are expressed as the mean ± standard deviation (SD). All data were analyzed by covariance (ANCOVA), accounting for sex, age, years of education. CN: cognitively normal; CI: cognitive impairment; TI, temporal inner; TO, temporal outer; NI, nasal inner; NO, nasal outer; SI, superior inner; SO, superior outer, II, inferior inner, IO, inferior outer; FAZ, foveal avascular zone; RNFL, retinal nerve fiber layer; ILM-RPE, inner limiting membrane - retinal pigment epithelium. \* < 0.05.

**Table S2.** Comparison of white matter integrity between cognitively normal group and cognitive impairment group.

| Items      | CN (21)            | CI (27)            | F     | <i>p</i> -value |
|------------|--------------------|--------------------|-------|-----------------|
| <b>FA</b>  |                    |                    |       |                 |
| ATR        | 0.42 ± 0.03        | 0.43 ± 0.026       | 3.27  | 0.148           |
| CST        | 0.6 ± 0.04         | 0.6 ± 0.028        | 0.35  | 0.704           |
| CgC        | 0.54 ± 0.04        | 0.53 ± 0.043       | 0.11  | 0.896           |
| CgH        | 0.48 ± 0.04        | 0.46 ± 0.039       | 1.77  | 0.183           |
| Fma        | 0.57 ± 0.03        | 0.56 ± 0.033       | 0.37  | 0.692           |
| IFO        | 0.49 ± 0.02        | 0.47 ± 0.035       | 0.03  | 0.970           |
| ILF        | 0.47 ± 0.02        | 0.46 ± 0.03        | 0.22  | 0.800           |
| SLF        | 0.46 ± 0.04        | 0.47 ± 0.026       | 1.83  | 0.174           |
| UF         | 0.48 ± 0.03        | 0.46 ± 0.032       | 0.85  | 0.434           |
| tSLF       | 0.5 ± 0.03         | 0.49 ± 0.06        | 2.24  | 0.119           |
| <b>MD</b>  |                    |                    |       |                 |
| ATR        | 0.0008 ± 0.000074  | 0.00081 ± 0.000079 | 0.65  | 0.426           |
| CST        | 0.00072 ± 0.000031 | 0.00072 ± 0.000026 | 0.03  | 0.875           |
| CgC        | 0.00074 ± 0.000032 | 0.00076 ± 0.000044 | 0.35  | 0.559           |
| CgH        | 0.00073 ± 0.000046 | 0.00077 ± 0.000051 | 4.25  | 0.046*          |
| Fma        | 0.00078 ± 0.000029 | 0.00079 ± 0.000046 | 0.06  | 0.807           |
| IFO        | 0.00078 ± 0.000031 | 0.0008 ± 0.000048  | 0.04  | 0.834           |
| ILF        | 0.00079 ± 0.000028 | 0.00081 ± 0.000053 | 0.28  | 0.597           |
| SLF        | 0.00075 ± 0.000047 | 0.00075 ± 0.000033 | 0.43  | 0.515           |
| UF         | 0.00076 ± 0.00003  | 0.00078 ± 0.00005  | 0.05  | 0.833           |
| tSLF       | 0.00078 ± 0.000029 | 0.00079 ± 0.000049 | 0.35  | 0.555           |
| <b>AxD</b> |                    |                    |       |                 |
| ATR        | 0.00118 ± 0.000077 | 0.00121 ± 0.000089 | 0     | 1               |
| CST        | 0.00128 ± 0.000041 | 0.00128 ± 0.000026 | 0     | 1               |
| CgC        | 0.00123 ± 0.000054 | 0.00125 ± 0.000055 | 0.295 | 0.59            |
| CgH        | 0.00115 ± 0.000062 | 0.00119 ± 0.000056 | 5.043 | 0.03*           |
| Fma        | 0.00136 ± 0.000039 | 0.00138 ± 0.000041 | 0.953 | 0.335           |
| IFO        | 0.00124 ± 0.000033 | 0.00125 ± 0.000042 | 0.026 | 0.873           |
| ILF        | 0.00123 ± 0.000042 | 0.00126 ± 0.000056 | 1.19  | 0.282           |
| SLF        | 0.00114 ± 0.000043 | 0.00116 ± 0.00004  | 0.691 | 0.411           |
| UF         | 0.00121 ± 0.000039 | 0.00121 ± 0.000054 | 0.01  | 0.922           |
| tSLF       | 0.00125 ± 0.000054 | 0.00126 ± 0.000086 | 0.178 | 0.676           |
| <b>RD</b>  |                    |                    |       |                 |
| ATR        | 0.00061 ± 0.000076 | 0.00061 ± 0.000076 | 1.43  | 0.239           |
| CST        | 0.00044 ± 0.000041 | 0.00044 ± 0.000035 | 0.03  | 0.872           |
| CgC        | 0.0005 ± 0.00004   | 0.00052 ± 0.000054 | 0.16  | 0.691           |
| CgH        | 0.00052 ± 0.000047 | 0.00057 ± 0.000057 | 2.55  | 0.118           |
| Fma        | 0.00048 ± 0.000037 | 0.0005 ± 0.000054  | 0.02  | 0.885           |
| IFO        | 0.00055 ± 0.000034 | 0.00057 ± 0.000056 | 0.04  | 0.838           |
| ILF        | 0.00057 ± 0.000028 | 0.00059 ± 0.000056 | 0.02  | 0.895           |

|      |                    |                    |      |       |
|------|--------------------|--------------------|------|-------|
| SLF  | 0.00056 ± 0.000057 | 0.00055 ± 0.000036 | 1.53 | 0.224 |
| UF   | 0.00053 ± 0.000037 | 0.00056 ± 0.000054 | 0.11 | 0.739 |
| tSLF | 0.00054 ± 0.000029 | 0.00056 ± 0.000059 | 0.22 | 0.638 |

Data are expressed as the mean ± standard deviation (SD). All data were analyzed by covariance (ANCOVA), accounting for sex, age, years of education. Abbreviations: CN: cognitive normal; CI: cognitive impairment; CgH: Cingulum hippocampus; UF: Uncinate fasciculus; FA: fractional anisotropy; MD: mean diffusivity; AxD: Axial Diffusivity; RD: Radial Diffusivity. ATR: anterior thalamic radiation; CgC: cingulum in the cingulated cortex area; CgH: cingulum in the hippocampal area; CST: corticospinal tract; FMa: forceps major; IFO: inferior fronto-occipital fasciculus; ILF: inferior longitudinal fasciculus; SLF: superior longitudinal fasciculus; tSLF: the temporal projection of the SLF; UF: uncinate fasciculus. \* < 0.05.

**Table S3.** Relationship Between hippocampal subfield volumes and retinal parameters in CI group.

| Partial Correlation                                |                       |               |                  |                        |              |                          |
|----------------------------------------------------|-----------------------|---------------|------------------|------------------------|--------------|--------------------------|
| Control                                            | Items                 | Subiculu<br>m | Presubiculu<br>m | Molecular_<br>layer_HP | GC-ML-<br>DG | Whole<br>hippocam<br>pus |
| Age,<br>Gender,<br>Years of<br>educatio<br>n, eTIV | <b>Vessel density</b> |               |                  |                        |              |                          |
|                                                    | Center Ring           | 0.142         | 0.417            | 0.051                  | 0.060        | 0.157                    |
|                                                    | Inner Ring            | 0.017         | 0.250            | -0.057                 | 0.019        | 0.024                    |
|                                                    | Outer Ring            | 0.293         | 0.435*           | 0.257                  | 0.310        | 0.305                    |
|                                                    | Full Area             | 0.220         | 0.398            | 0.170                  | 0.231        | 0.231                    |
|                                                    | FAZ Area              | 0.041         | 0.252            | -0.009                 | -0.001       | -0.008                   |
|                                                    | VD_TI                 | 0.245         | 0.400            | 0.108                  | 0.168        | 0.175                    |
|                                                    | VD_SI                 | 0.150         | 0.438            | 0.062                  | 0.044        | 0.130                    |
|                                                    | VD_NI                 | -0.033        | 0.176            | -0.152                 | -0.129       | -0.084                   |
|                                                    | VD_II                 | 0.198         | 0.356            | 0.189                  | 0.189        | 0.197                    |
|                                                    | VD_TO                 | 0.196         | 0.300            | 0.155                  | 0.174        | 0.180                    |
|                                                    | VD_SO                 | 0.523*        | 0.593**          | 0.463*                 | 0.452*       | 0.487*                   |
|                                                    | VD_NO                 | 0.440         | 0.559*           | 0.339                  | 0.301        | 0.348                    |
|                                                    | VD_IO                 | 0.142         | 0.417            | 0.051                  | 0.060        | 0.157                    |
|                                                    | <b>Thickness</b>      |               |                  |                        |              |                          |
|                                                    | RNFL                  | 0.264         | 0.160            | 0.317                  | 0.271        | 0.284                    |
|                                                    | RNFL_T                | 0.011         | -0.113           | -0.039                 | -0.099       | -0.056                   |
|                                                    | RNFL_S                | 0.235         | 0.162            | 0.277                  | 0.267        | 0.236                    |
|                                                    | RNFL_N                | 0.276         | 0.176            | 0.357                  | 0.339        | 0.329                    |
|                                                    | RNFL_I                | 0.215         | 0.253            | 0.291                  | 0.274        | 0.296                    |
|                                                    | ILM-RFE_TI            | 0.303         | 0.336            | 0.299                  | 0.248        | 0.355                    |
|                                                    | ILM-RFE_SI            | 0.309         | 0.287            | 0.293                  | 0.224        | 0.350                    |
|                                                    | ILM-RFE_NI            | 0.307         | 0.278            | 0.312                  | 0.234        | 0.363                    |
|                                                    | ILM-RFE_II            | 0.388         | 0.381            | 0.342                  | 0.273        | 0.375                    |
|                                                    | ILM-RFE_TO            | 0.222         | 0.218            | 0.223                  | 0.192        | 0.209                    |
|                                                    | ILM-RFE_SO            | 0.198         | 0.157            | 0.205                  | 0.134        | 0.187                    |
|                                                    | ILM-RFE_NO            | 0.284         | 0.258            | 0.297                  | 0.207        | 0.274                    |
|                                                    | ILM-RFE_IO            | 0.009         | 0.028            | 0.042                  | -0.008       | 0.039                    |

Partial correlation was conducted controlling for age, gender, years of education, and eTIV. FAZ: foveal avascular zone; TI: temporal inner; TO: temporal outer; NI: nasal inner; NO: nasal outer; SI: superior inner; SO: superior outer; II: inferior inner, IO: inferior outer; VD: vessel density; RNFL: retinal nerve fiber layer; T: temporal, S: superior; N: nasal; I: inferior; ILM-RPE: inner limiting membrane - retinal pigment epithelium; GC-ML-DG: Molecular and Granule Cell Layers of the Dentate. \* < 0.05.

**Table S4.** Relationship Between hippocampal subfield volumes and retinal parameters in CN group.

| Partial Correlation                                |                       |               |                  |                        |              |                          |
|----------------------------------------------------|-----------------------|---------------|------------------|------------------------|--------------|--------------------------|
| Control                                            | Items                 | Subiculu<br>m | Presubiculu<br>m | Molecular_<br>layer_HP | GC-ML-<br>DG | Whole<br>hippocam<br>pus |
| Age,<br>Gender,<br>Years of<br>educatio<br>n, eTIV | <b>Vessel density</b> |               |                  |                        |              |                          |
|                                                    | Center Ring           | 0.200         | 0.548*           | −0.041                 | 0.105        | −0.041                   |
|                                                    | Inner Ring            | 0.264         | 0.445            | 0.073                  | 0.237        | 0.018                    |
|                                                    | Outer Ring            | 0.333         | 0.239            | 0.177                  | 0.278        | 0.135                    |
|                                                    | Full Area             | 0.323         | 0.315            | 0.150                  | 0.273        | 0.104                    |
|                                                    | FAZ Area              | 0.187         | 0.339            | 0.029                  | 0.246        | −0.017                   |
|                                                    | VD_TI                 | 0.186         | 0.392            | −0.066                 | 0.081        | −0.088                   |
|                                                    | VD_SI                 | 0.305         | 0.502*           | 0.094                  | 0.175        | 0.010                    |
|                                                    | VD_NI                 | 0.328         | 0.442            | 0.233                  | 0.377        | 0.175                    |
|                                                    | VD_II                 | 0.216         | 0.250            | 0.115                  | 0.323        | 0.106                    |
|                                                    | VD_TO                 | 0.254         | 0.139            | 0.053                  | 0.171        | 0.060                    |
|                                                    | VD_SO                 | 0.261         | 0.166            | 0.106                  | 0.053        | 0.039                    |
|                                                    | VD_NO                 | 0.367         | 0.197            | 0.310                  | 0.354        | 0.236                    |
|                                                    | VD_IO                 | 0.200         | 0.548*           | −0.041                 | 0.105        | −0.041                   |
|                                                    | <b>Thickness</b>      |               |                  |                        |              |                          |
|                                                    | RNFL                  | −0.105        | −0.210           | 0.030                  | −0.073       | −0.028                   |
|                                                    | RNFL_T                | −0.037        | 0.334            | −0.046                 | −0.158       | −0.163                   |
|                                                    | RNFL_S                | −0.192        | −0.202           | −0.037                 | −0.105       | −0.018                   |
|                                                    | RNFL_N                | 0.021         | −0.334           | 0.235                  | 0.200        | 0.198                    |
|                                                    | RNFL_I                | −0.086        | −0.307           | −0.097                 | −0.139       | −0.081                   |
|                                                    | ILM-RFE_TI            | −0.084        | 0.196            | 0.081                  | 0.015        | −0.029                   |
|                                                    | ILM-RFE_SI            | −0.098        | 0.148            | 0.014                  | −0.053       | −0.078                   |
|                                                    | ILM-RFE_NI            | −0.012        | 0.297            | 0.061                  | −0.088       | −0.046                   |
|                                                    | ILM-RFE_II            | 0.013         | 0.133            | 0.198                  | 0.087        | 0.075                    |
|                                                    | ILM-RFE_TO            | −0.043        | −0.072           | 0.093                  | 0.160        | 0.027                    |
|                                                    | ILM-RFE_SO            | −0.064        | −0.052           | 0.097                  | 0.097        | 0.017                    |
|                                                    | ILM-RFE_NO            | −0.127        | −0.150           | 0.147                  | 0.017        | 0.021                    |
|                                                    | ILM-RFE_IO            | −0.112        | −0.157           | 0.231                  | 0.155        | 0.136                    |

Partial correlation was conducted controlling for age, gender, years of education, and eTIV. FAZ: foveal avascular zone; TI: temporal inner; TO: temporal outer; NI: nasal inner; NO: nasal outer; SI: superior inner; SO: superior outer; II: inferior inner, IO: inferior outer; VD: vessel density; RNFL: retinal nerve fiber layer; T: temporal, S: superior; N: nasal; I: inferior; ILM-RPE: inner limiting membrane - retinal pigment epithelium; GC-ML-DG: Molecular and Granule Cell Layers of the Dentate. \* < 0.05.

**Table S5.** Relationship Between Diffusion Metrics and retinal parameters in CN group.

| Partial Correlation                      |                       |          |           |
|------------------------------------------|-----------------------|----------|-----------|
| Control                                  | Items                 | CgH (MD) | CgH (AxD) |
| Age,<br>Gender,<br>Years of<br>education | <b>Vessel density</b> |          |           |
|                                          | Center Ring           | -0.397   | -0.194    |
|                                          | inner Ring            | -0.072   | -0.216    |
|                                          | Outer Ring            | -0.235   | -0.323    |
|                                          | Full Area             | -0.156   | -0.366    |
|                                          | FAZ Area              | 0.175    | -0.013    |
|                                          | VD_TI                 | -0.268   | -0.354    |
|                                          | VD_SI                 | -0.094   | -0.217    |
|                                          | VD_NI                 | 0.207    | -0.135    |
|                                          | VD_II                 | -0.098   | -0.100    |
|                                          | VD_TO                 | -0.174   | -0.320    |
|                                          | VD_SO                 | -0.283   | -0.210    |
|                                          | VD_NO                 | -0.272   | -0.102    |
|                                          | VD_IO                 | -0.397   | -0.194    |
|                                          | <b>Thickness</b>      |          |           |
|                                          | RNFL                  | -0.158   | 0.108     |
|                                          | RNFL_T                | 0.115    | 0.205     |
|                                          | RNFL_S                | -0.091   | -0.033    |
|                                          | RNFL_N                | -0.463   | -0.138    |
|                                          | RNFL_I                | -0.076   | 0.230     |
|                                          | ILM-RFE_TI            | -0.331   | 0.015     |
|                                          | ILM-RFE_SI            | -0.128   | 0.139     |
|                                          | ILM-RFE_NI            | -0.287   | -0.041    |
|                                          | ILM-RFE_II            | 0.121    | 0.147     |
|                                          | ILM-RFE_TO            | -0.361   | -0.147    |
|                                          | ILM-RFE_SO            | -0.149   | -0.004    |
|                                          | ILM-RFE_NO            | -0.321   | -0.068    |
|                                          | ILM-RFE_IO            | -0.087   | 0.028     |

Partial correlation was conducted controlling for age, gender, years of education. FAZ: foveal avascular zone; TI: temporal inner; TO: temporal outer; NI: nasal inner; NO: nasal outer; SI: superior inner; SO: superior outer; II: inferior inner, IO: inferior outer; VD: vessel density; RNFL: retinal nerve fiber layer; T: temporal, S: superior; N: nasal; I: inferior; ILM-RFE: inner limiting membrane - retinal pigment epithelium; All data were analyzed via two-sample t-test. CN: cognitively normal; CI: cognitive impairment; CgH: Cingulum hippocampus; UF: Uncinate fasciculus; FA: fractional anisotropy; MD: mean diffusivity; AxD: Axial Diffusivity; RD: Radial Diffusivity. \* <0.05.

**Table S6.** Relationship Between Diffusion Metrics and retinal parameters in CN group.

|                                          |                       | Partial Correlation |           |
|------------------------------------------|-----------------------|---------------------|-----------|
| Control                                  | Items                 | CgH (MD)            | CgH (AxD) |
| Age,<br>Gender,<br>Years of<br>education | <b>Vessel density</b> |                     |           |
|                                          | Center Ring           | -0.263              | -0.334    |
|                                          | inner Ring            | -0.387              | -0.304    |
|                                          | Outer Ring            | -0.205              | -0.179    |
|                                          | Full Area             | -0.267              | -0.227    |
|                                          | FAZ Area              | -0.397              | -0.337    |
|                                          | VD_TI                 | 0.454               | 0.495*    |
|                                          | VD_SI                 | -0.309              | -0.225    |
|                                          | VD_NI                 | -0.383              | -0.284    |
|                                          | VD_II                 | -0.350              | -0.362    |
|                                          | VD_TO                 | -0.193              | -0.223    |
|                                          | VD_SO                 | 0.013               | 0.032     |
|                                          | VD_NO                 | -0.127              | 0.004     |
|                                          | VD_IO                 | -0.263              | -0.334    |
|                                          | <b>Thickness</b>      |                     |           |
|                                          | RNFL                  | 0.043               | 0.130     |
|                                          | RNFL_T                | 0.158               | 0.265     |
|                                          | RNFL_S                | -0.290              | -0.208    |
|                                          | RNFL_N                | -0.007              | 0.057     |
|                                          | RNFL_I                | -0.035              | 0.016     |
|                                          | ILM-RFE_TI            | -0.043              | 0.141     |
|                                          | ILM-RFE_SI            | 0.058               | 0.126     |
|                                          | ILM-RFE_NI            | 0.015               | 0.143     |
|                                          | ILM-RFE_II            | 0.155               | 0.088     |
|                                          | ILM-RFE_TO            | 0.029               | 0.171     |
|                                          | ILM-RFE_SO            | 0.185               | 0.168     |
|                                          | ILM-RFE_NO            | -0.015              | 0.114     |
|                                          | ILM-RFE_IO            | 0.186               | 0.238     |

Partial correlation was conducted controlling for age, gender, years of education. FAZ: foveal avascular zone; TI: temporal inner; TO: temporal outer; NI: nasal inner; NO: nasal outer; SI: superior inner; SO: superior outer; II: inferior inner, IO: inferior outer; VD: vessel density; RNFL: retinal nerve fiber layer; T: temporal, S: superior; N: nasal; I: inferior; ILM-RPE: inner limiting membrane - retinal pigment epithelium; All data were analyzed via two-sample t-test. CN: cognitively normal; CI: cognitive impairment; CgH: Cingulum hippocampus; UF: Uncinate fasciculus; FA: fractional anisotropy; MD: mean diffusivity; AxD: Axial Diffusivity; RD: Radial Diffusivity. \* <0.05.

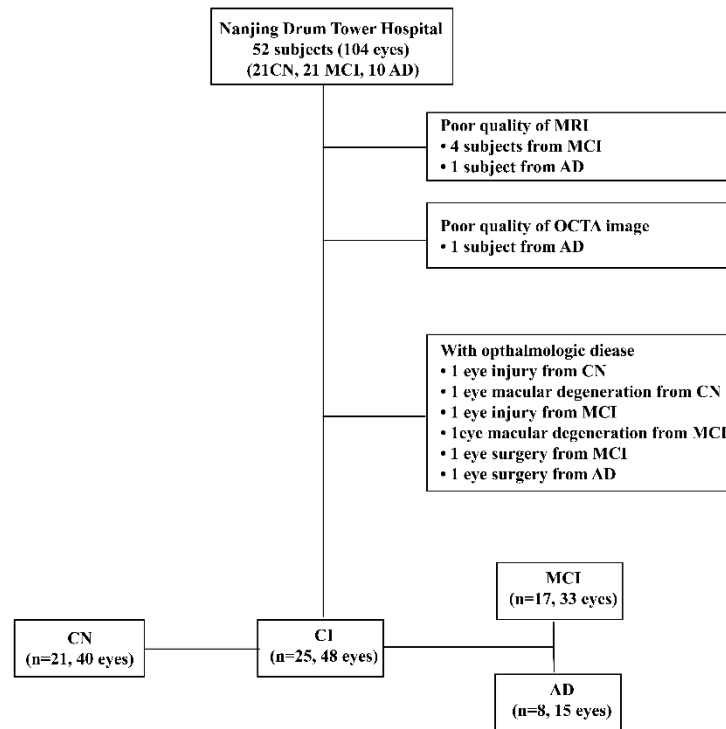

**Figure S1.** Flow Diagram of the Inclusion Process. CN, cognitively normal; MCI; mild cognitive impairment. AD, Alzheimer's Disease; CI; cognitive impairment. MRI, magnetic resonance imaging.



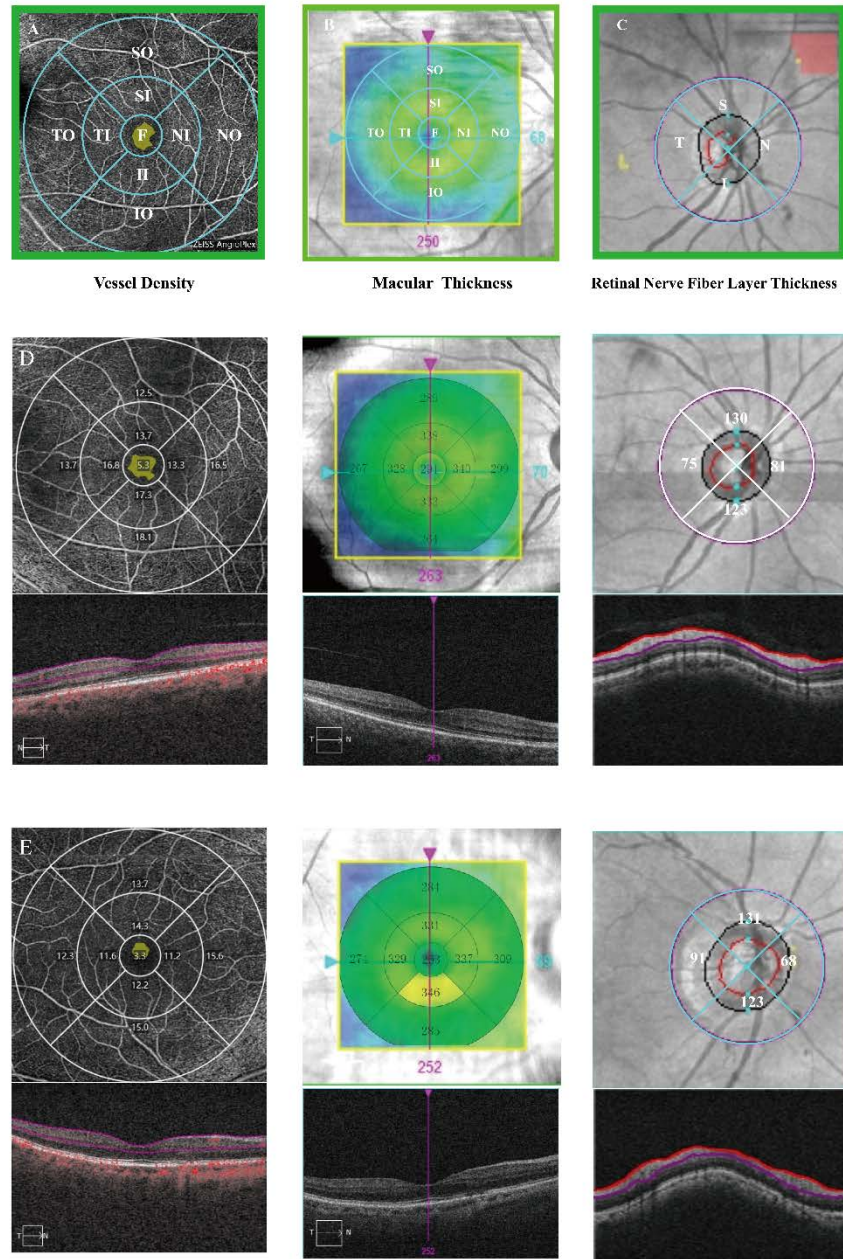

**Figure S2.** OCTA images. (A, B) In the macula, vessel density and retinal macular thickness are measured in the fovea (F) ( $\varnothing$  1 mm), inner ring ( $\varnothing$  3 mm), and outer ring ( $\varnothing$  6 mm) following the Early Treatment Diabetic Retinopathy Study (ETDRS) grid. The inner ring and outer ring are subdivided into four sectors (superior, nasal, inferior, and temporal). (C) Around the optic nerve head (peripapillary): retinal nerve fiber layer (RNFL) thickness was measured in the following sectors: temporal (T), superior (S), nasal (N), inferior (I), and mean RNFL thickness (RNFL). (D) Retinal scan images and B-scans from healthy eye. (E) Retinal scan images and B-scans from patient eye.
